# Supplementary material for: The Fucoxanthin Chlorophyll a/c-Binding Protein in Tisochrysis lutea: Influence of Nitrogen and Light on Fucoxanthin and Chlorophyll a/c-Binding Protein Gene Expression and Fucoxanthin Synthesis
Source: Front Plant Sci. 2022 Feb 17;13:830069. doi: 10.3389/fpls.2022.830069 (PMC8891753; doi:10.3389/fpls.2022.830069)
Supplement: Supplementary file 2 [file Table_1.XLSX]

## Sheet: Table S3
		T. lutea VS P. tricornutum (bitscore)
	Name prot. T. lutea	Lhcr1	Lhcr2	Lhcr3	Lhcr4	Lhcr5	Lhcr6	Lhcr7	Lhcr8	Lhcr9	Lhcr10	Lhcr11	Lhcr12	Lhcr13	Lhcr14	AVG	Lhcx1	Lhcx2	Lhcx3	Lhcx4	AVG	Lhcf1	Lhcf2	Lhcf3	Lhcf4	Lhcf5	Lhcf6	Lhcf7	Lhcf8	Lhcf9	Lhcf10	Lhcf11	Lhcf12	Lhcf13	Lhcf14	Lhcf15	Lhcf16	Lhcf17	AVG
Lhcx1	TISO_00499	69.7	66.6	52.4	64.7	72.8	84	81.6	68.6	78.2	82.4	60.1	47.8	71.2	0	64.2929	150	135	149	147	145.25	48.5	51.6	49.7	49.7	58.2	46.2	46.2	45.1	46.2	52	57.4	50.1	59.7	59.3	54.3	63.9	57.4	52.6765
Lhcr1	TISO_02238	88.6	103	82.8	78.6	83.2	104	62.4	94.7	96.3	87.8	91.7	91.7	79.7	58.5	85.9286	65.1	58.9	69.3	61.6	63.725	0	0	0	0	0	0	0	0	0	0	0	0	45.8	46.2	39.7	60.5	39.3	13.6176
Lhcr2	TISO_02239	62	72	57	102	43.1	45.8	45.8	45.4	41.6	46.6	68.9	81.6	70.5	50.1	59.4571	44.3	0	0	0	11.075	0	0	0	0	0	0	0	0	0	0	0	0	0	0	0	0	0	0
Lhcx2	TISO_06854	79.3	57.4	54.7	58.5	68.6	74.3	79	78.6	42	72	52.8	51.2	69.7	49.7	63.4143	149	140	147	137	143.25	45.8	46.6	49.7	49.7	54.3	45.8	45.8	48.5	41.2	49.7	55.1	0	59.3	62.4	53.9	52.4	61.2	48.3176
Lhcr3	TISO_07183	95.5	111	114	153	77.8	90.9	75.9	89.7	81.6	88.6	132	156	94	103	104.5	55.5	52.8	53.5	55.8	54.4	56.2	45.4	55.1	55.1	52	48.5	48.5	51.6	52.4	53.9	59.3	49.7	57.8	50.8	44.3	54.3	43.1	51.6471
Lhcx3	TISO_07276	85.1	62.8	50.1	71.6	63.2	93.6	85.1	78.2	40	89	63.9	54.3	81.6	53.1	69.4	117	120	113	106	114	47	53.1	46.6	46.6	50.8	50.8	50.8	56.6	60.5	55.1	47	55.5	57.4	62	60.5	49.3	71.6	54.1882
Lhcr4	TISO_07308	85.1	53.9	73.9	61.6	0	58.9	55.1	48.9	52.8	52	68.9	66.6	79	65.5	58.7286	58.9	48.1	53.5	58.9	54.85	55.5	47.4	51.2	51.2	55.8	52	52	50.4	54.7	53.1	58.2	51.6	50.4	54.7	43.9	63.5	63.9	53.5
Lhcf1	TISO_07452	55.5	0	46.6	42	0	0	0	0	40	43.1	54.7	54.3	53.5	53.1	31.6286	63.2	52.8	58.5	63.5	59.5	115	124	118	118	118	119	119	135	110	126	122	97.1	81.6	81.6	70.1	73.6	117	108.529
Lhcf2	TISO_07587	44.7	0	42	43.5	0	0	0	0	0	0	45.1	42.4	53.5	42	22.3714	55.8	39.3	60.8	59.3	53.8	91.7	88.2	89	89	84	96.3	96.3	96.3	95.9	89.7	89.4	101	53.9	57	53.1	62.4	113	85.0706
Lhcf3	TISO_08095	47.4	0	45.4	43.5	45.1	0	0	0	0	47	50.4	44.3	58.5	42.4	30.2857	53.5	43.9	60.5	60.8	54.675	100	96.7	95.1	95.1	101	100	100	101	110	93.2	98.2	80.5	66.6	62	57.4	78.2	120	91.4706
Lhcf4	TISO_08517	58.2	0	50.8	49.7	0	0	0	0	0	44.7	44.3	0	52.4	45.1	24.6571	57.4	0	58.2	59.7	43.825	50.8	44.7	52	52	58.9	44.3	44.3	45.4	48.9	51.6	60.8	52.4	45.1	41.2	44.3	109	57.8	53.1471
Lhcr5	TISO_09963	55.1	75.5	51.2	47.8	89.7	140	118	104	147	133	62	46.6	50.4	0	80.0214	47	0	42.4	53.9	35.825	0	0	0	0	38.9	0	0	0	0	0	0	0	0	0	0	0	0	2.28824
Lhcx4	TISO_11242	87.4	58.2	60.8	76.6	62.4	91.3	80.5	80.5	90.9	89.7	76.3	63.9	83.6	55.1	75.5143	131	135	132	124	130.5	49.3	50.8	57.4	57.4	50.8	57.4	57.4	61.6	59.7	59.3	57	57.4	63.9	67	63.2	61.6	73.2	59.0824
Lhcf5	TISO_11770	55.5	56.2	52.8	52.4	40.8	54.3	43.5	50.4	57.8	48.5	51.2	47.4	65.5	56.2	52.3214	62	58.2	55.1	53.1	57.1	76.3	77.4	80.5	80.5	75.9	66.2	66.2	84.3	80.5	67.8	75.9	50.1	57	77.8	67	158	62	76.6706
Lhcf6	TISO_12017	55.1	39.3	55.8	43.9	41.2	42.4	42	0	41.2	51.2	45.4	47.8	56.2	54.7	44.0143	68.2	42.7	66.2	55.8	58.225	77.8	70.5	80.5	80.5	79	72.8	72.8	65.1	71.2	69.3	81.3	56.2	55.8	64.3	68.6	144	65.5	75.0118
Lhcf7	TISO_12558	0	0	0	0	0	0	0	0	0	0	0	0	0	0	0	0	0	0	0	0	0	0	0	0	0	0	0	0	0	0	0	0	0	0	0	73.2	0	4.30588
Lhcf8	TISO_14333	55.5	49.3	43.5	51.2	40.8	41.2	46.6	0	43.9	43.1	50.8	45.8	76.6	50.8	45.65	72.4	54.7	73.9	74.3	68.825	125	123	124	124	124	129	129	105	129	108	127	118	113	119	92.4	77.8	120	116.894
Lhcf9	TISO_14677	43.9	0	40.8	0	0	0	0	0	0	40.8	38.9	0	43.9	0	14.8786	66.6	55.5	59.3	49.3	57.675	98.2	110	109	109	102	117	117	106	109	106	105	87.4	75.1	86.3	70.5	59.7	112	98.7765
Lhcf10	TISO_16944	43.5	0	38.9	0	0	0	0	0	0	40.4	0	0	0	0	8.77143	65.5	55.8	58.5	48.9	57.175	96.7	109	108	108	101	118	118	107	109	106	104	85.1	74.7	85.9	72.8	58.2	114	98.5529
Lhcf11	TISO_16947	0	0	0	0	0	0	0	0	0	0	0	0	0	0	0	40.4	0	0	0	10.1	50.8	45.1	47.8	47.8	50.1	44.3	44.3	43.9	43.5	46.2	50.4	0	38.5	38.5	0	0	38.9	37.0647
Lhcf12	TISO_17799	67	0	39.7	0	40.8	40	50.4	48.1	39.7	43.5	52.8	43.5	78.6	56.6	42.9071	77.8	70.5	73.6	59.7	70.4	100	110	109	109	101	102	102	104	107	90.9	105	82	255	266	207	65.9	107	124.871
Lhcf13	TISO_18058	0	0	0	0	0	0	0	0	0	0	0	0	0	0	0	0	0	0	0	0	37.4	43.5	41.2	41.2	43.1	42	42	43.1	45.4	42.4	41.6	36.6	0	0	0	0	46.2	32.1
Lhcf14	TISO_18150	41.2	0	49.7	0	0	0	0	0	0	0	46.2	0	47.8	40.4	16.0929	60.5	48.5	57.4	47.8	53.55	93.6	108	106	106	100	112	112	109	115	105	104	87.4	80.1	87.4	71.2	60.8	122	98.7941
Lhcf15	TISO_18151	41.6	0	48.9	0	0	0	0	0	0	0	46.2	0	47.8	40	16.0357	60.5	48.1	57.4	47.8	53.45	93.6	108	106	106	100	111	111	109	115	105	104	87.4	79.7	87.4	70.9	61.2	122	98.6588
Lhcf16	TISO_19125	52.8	0	0	50.4	0	0	0	0	0	42	0	39.7	41.6	0	16.1786	57.8	48.5	46.2	49.7	50.55	68.2	67.8	73.2	73.2	76.6	70.1	70.1	77.8	82	72.4	80.9	72.8	62.8	60.1	47.4	107	61.2	71.9765
Lhcf17	TISO_19286	73.6	0	54.7	54.3	0	0	0	0	0	54.7	0	50.8	49.7	0	24.1286	63.2	51.2	61.2	47.4	55.75	80.9	70.9	73.6	73.6	82	73.6	73.6	75.5	73.2	70.9	89	66.6	50.4	56.6	38.9	116	65.5	72.4
Lhcf18	TISO_20897	50.1	0	47.4	0	0	0	0	0	0	0	0	0	42.7	0	10.0143	65.5	55.8	52.8	52.4	56.625	100	112	105	105	98.6	110	110	106	105	101	101	87.8	63.2	72.8	59.3	62	97.8	93.9118
Lhcx5	TISO_22079	67.4	67	39.7	74.3	57.8	67.4	54.3	59.7	63.2	49.7	50.4	64.3	73.6	61.2	60.7143	105	90.9	96.7	94	96.65	82	82	79.3	79.3	77.4	74.3	74.3	83.2	72.8	75.1	79.3	77	86.7	85.1	68.2	75.1	76.3	78.0824
Lhcf19	TISO_22153	40.8	40	40.8	43.1	0	0	0	0	44.3	0	0	48.1	54.3	51.6	25.9286	46.6	41.2	50.4	50.4	47.15	93.6	93.2	93.2	93.2	86.7	107	107	93.6	98.2	97.1	91.3	92	67.8	68.6	63.2	70.5	101	89.2471
Lhcf20	TISO_22154	49.7	39.7	0	47.8	0	0	0	0	0	46.6	0	50.1	54.3	0	20.5857	59.3	45.8	57	52.8	53.725	97.1	103	88.6	88.6	92	111	111	95.5	100	100	94.7	89.7	61.6	67	57.4	67.4	95.9	89.4412
Lhcf21	TISO_22383	65.1	0	48.1	59.7	0	0	0	0	0	0	52.8	42.4	48.1	41.6	25.5571	62	52.4	56.6	49.3	55.075	63.2	63.5	67.4	67.4	60.8	66.6	66.6	70.5	71.2	69.3	68.9	72	0	47.8	0	98.6	56.2	59.4118
Lhcr6	TISO_23096	54.3	49.7	48.5	62	117	161	144	127	162	153	48.1	52	58.5	51.2	92.0214	62.8	43.5	63.9	58.9	57.275	40	41.2	0	0	40.8	0	0	42	0	0	0	0	52	55.1	41.2	55.5	0	21.6353
Lhcx6	TISO_23378	51.2	49.3	48.5	44.3	76.3	73.9	80.5	53.9	70.1	65.5	0	40	68.2	52.4	55.2929	135	133	139	117	131	52.4	54.7	51.6	51.6	48.9	51.6	51.6	48.1	53.9	45.8	50.8	41.2	55.1	47.8	45.1	48.5	52.8	50.0882
Lhcx7	TISO_23447	51.6	61.6	0	53.5	73.9	74.3	87.8	59.7	75.5	82.8	47	45.4	65.1	49.3	59.1071	144	42.4	135	127	112.1	52.8	48.1	58.2	58.2	59.3	41.6	41.6	54.3	52	50.8	58.9	40	53.9	48.9	48.1	45.4	60.8	51.3471
Lhcx8	TISO_23500	68.6	58.2	48.9	60.5	47.8	67	53.1	48.1	65.5	65.5	46.6	0	64.7	50.4	53.2071	124	115	121	110	117.5	43.5	52	47.8	47.8	49.3	50.4	50.4	53.9	46.6	46.6	48.9	0	53.9	51.6	43.5	60.5	58.5	47.3647
Lhcx9	TISO_23568	65.5	67.4	59.7	55.5	72.4	77.8	84.3	70.5	43.5	81.6	62	0	81.6	53.5	62.5214	163	151	158	150	155.5	51.6	49.7	47.4	47.4	57.8	45.8	45.8	43.9	47	54.7	57.4	49.7	69.3	55.8	60.1	64.7	60.8	53.4647
Lhcx10	TISO_23574	65.5	67.4	59.7	55.5	72	77.8	84.3	70.5	43.5	81.6	61.6	0	81.6	53.5	62.4643	163	151	158	150	155.5	51.6	49.7	47.4	47.4	57.8	45.8	45.8	43.9	47	54.7	57.4	49.7	69.3	55.5	60.1	64.7	61.2	53.4706
Lhcr7	TISO_23827	155	91.3	95.1	104	66.2	77.4	87.8	63.2	87.8	67	66.6	89.7	96.7	68.6	86.8857	70.9	53.5	71.2	66.2	65.45	64.3	53.5	57.4	57.4	63.5	51.6	51.6	52.8	49.3	57.8	63.2	0	64.7	67.8	58.2	42	57.4	53.6765
Lhcx11	TISO_24321	66.6	59.3	58.2	57.4	69.7	83.6	85.9	73.6	83.2	78.6	62	46.6	75.1	53.5	68.0929	156	152	161	138	151.75	40.8	42	46.6	46.6	46.6	43.9	43.9	42.7	42	50.4	45.8	48.9	66.2	53.9	59.7	54.7	62.4	49.2412
Lhcf22	TISO_24608	70.5	0	49.7	43.1	41.2	43.9	55.5	55.8	40	46.2	58.9	49.7	73.9	62.8	49.3714	76.3	72.4	74.7	71.2	73.65	103	119	115	115	108	103	103	104	118	87.8	112	91.3	268	258	203	64.3	99.4	127.753
Lhcr8	TISO_24841	101	97.8	105	134	71.2	77.8	75.1	69.7	40.8	72	117	137	103	99	92.8857	58.9	57.8	57.8	57.8	58.075	42	40.4	47.4	47.4	43.5	41.2	41.2	45.4	38.9	41.6	47.8	43.5	49.3	41.6	38.5	42.7	50.8	43.7176
Lhcf23	TISO_25321	0	0	0	0	0	0	0	0	0	0	0	0	0	0	0	0	0	0	0	0	0	0	0	0	0	0	0	0	0	0	0	0	0	0	0	0	0	0
Lhcx12	TISO_26583	74.7	66.6	50.1	60.8	63.5	77	73.2	72	75.9	69.7	52	51.2	77.8	42.7	64.8	160	149	156	137	150.5	50.4	56.6	55.8	55.8	57	51.2	51.2	57	50.8	47.4	62	0	70.9	57.8	63.2	56.2	50.1	52.5529
Lhcf24	TISO_26704	60.5	39.7	60.5	0	0	0	42.7	0	0	0	39.7	57.4	73.9	56.2	30.7571	56.2	40	64.7	65.1	56.5	79.3	74.7	79.3	79.3	72.4	74.3	74.3	77	89.4	78.2	78.6	73.6	64.3	67.4	55.1	141	52.8	77.1176
Lhcr9	TISO_28748	133	111	77.4	182	70.1	87.4	79.7	91.7	69.3	86.7	102	147	119	118	105.307	75.5	61.6	70.9	67.4	68.85	39.3	0	42	42	40	0	0	46.6	0	41.6	42.7	42	58.2	58.5	48.1	58.9	53.5	36.0824
Lhcf25	TISO_28817	58.2	56.6	61.2	42.4	49.7	64.7	56.6	59.3	62.4	61.2	45.1	50.1	71.6	58.2	56.95	83.6	71.6	82	65.5	75.675	75.5	73.6	74.7	74.7	78.2	67.4	67.4	77	77.4	70.9	75.9	64.3	74.7	82.8	69.3	67.4	102	74.8941
Lhcr10	TISO_29671	53.1	62	50.4	58.9	88.6	124	124	102	127	114	78.2	51.2	67	44.7	81.7929	67	58.5	60.1	50.4	59	40.8	38.9	42.4	42.4	40.4	0	0	41.2	0	0	43.9	0	49.7	41.2	0	0	0	22.4059
Lhcr11	TISO_32585	68.9	63.9	63.5	101	42	54.3	49.7	42	43.1	0	77.8	88.2	80.5	84	61.35	56.6	50.1	59.7	61.6	57	60.5	67	62.4	62.4	56.2	55.5	55.5	59.7	53.1	54.7	55.1	39.7	47	44.3	0	50.8	0	48.4647
Lhcr12	TISO_33089	87.8	92.8	98.6	150	73.2	82.4	68.6	83.2	75.1	77.8	117	130	87	82	93.25	55.8	58.9	50.4	58.9	56	0	0	0	0	0	0	0	0	0	0	0	0	38.5	39.3	0	47.4	0	7.36471
Lhcf26	TISO_36599	45.8	0	42.4	0	0	0	0	0	0	43.1	0	0	0	0	9.37857	67.8	56.6	60.5	50.1	58.75	97.4	108	107	107	100	119	119	105	108	104	103	86.3	77	86.3	72	62.8	115	98.6353
Lhcf27	TISO_36600	0	0	0	0	0	0	0	0	0	0	0	0	0	0	0	46.2	0	0	0	11.55	76.6	87.4	90.9	90.9	80.9	102	102	90.1	95.1	84.7	84.7	76.3	58.2	68.6	55.1	47	95.1	81.5059
Lhcf28	TISO_36835	57	55.8	49.3	49.7	0	60.8	43.5	48.5	50.1	54.7	47.4	47.8	53.1	50.1	47.7	59.3	48.5	60.5	48.9	54.3	73.9	67.4	65.5	65.5	64.3	83.6	83.6	73.6	78.6	65.9	68.9	68.6	67.4	60.5	48.9	107	67.8	71.2353

## Sheet: Table S4
		T. lutea VS F. cylindrus (bitscore)
	Name prot. T. lutea	Lhcr1	Lhcr2	Lhcr3	Lhcr4	Lhcr5	Lhcr6	Lhcr7	Lhcr8	Lhcr9	Lhcr10	Lhcr11	Lhcr12	Lhcr13	Lhcr14	Lhcr15	AVG	Lhcx1	Lhcx2	Lhcx3	Lhcx4	Lhcx5	Lhcx6	Lhcx7	Lhcx8	Lhcx9	Lhcx10	Lhcx11	AVG	Lhcf1	Lhcf2	Lhcf3	Lhcf4	Lhcf5	Lhcf6	Lhcf7	Lhcf8	Lhcf9	Lhcf10	Lhcf11	Lhcf12	Lhcf13	Lhcf14	Lhcf15	Lhcf16	Lhcf17	Lhcf18	Lhcf19	Lhcf20
Lhcx1	TISO_00499	62	77.4	65.1	54.3	42	52	79.3	74.3	67.8	51.6	78.2	59.7	47.8	57.8	74.3	62.9067	147	147	142	143	148	147	135	156	149	154	160	148	47.4	57	57.4	40.4	57.4	47.4	50.4	54.7	49.3	58.9	55.5	40	52	47.4	58.2	51.6	46.2	42	50.1	53.1
Lhcr1	TISO_02238	79.7	111	81.3	98.2	81.6	45.8	87.8	91.3	86.3	83.6	77	75.5	82.8	60.8	56.2	79.9267	63.9	67.4	72	67.8	62.4	67.4	46.6	55.8	52.8	55.1	70.1	61.9364	45.4	49.3	0	55.8	44.3	0	0	44.7	0	0	55.5	40.4	0	44.7	40	52.4	0	0	0	0
Lhcr2	TISO_02239	41.6	60.5	41.6	44.3	79.3	51.2	52	60.5	45.1	81.6	60.5	47	94.4	49.3	47	57.06	0	0	0	0	0	0	0	0	0	0	0	0	0	0	0	40.8	0	0	0	0	0	0	41.2	0	0	0	0	0	0	0	0	0
Lhcx2	TISO_06854	65.5	72	72.4	57.8	0	50.8	71.6	68.9	67	54.7	65.5	50.1	53.1	56.2	64.3	57.9933	154	153	134	135	135	152	125	148	145	145	145	142.818	39.7	44.3	49.7	38.9	43.1	40.8	43.9	49.3	42.7	65.9	48.5	42	50.4	51.2	42.7	44.7	53.9	45.4	43.5	54.3
Lhcr3	TISO_07183	98.6	117	99.8	89.7	113	82.8	89.7	93.6	108	157	85.1	81.3	160	72.4	70.1	101.207	53.5	53.5	43.9	51.2	51.6	48.9	52.4	49.3	43.1	51.2	54.3	50.2636	46.6	47	54.3	48.5	60.1	0	39.7	45.8	53.9	57.8	55.5	55.8	55.1	57.8	55.5	59.7	47	64.3	56.6	58.9
Lhcx3	TISO_07276	79.3	73.9	86.3	48.9	48.9	0	92	73.2	74.3	50.8	82	44.7	56.2	54.3	67	62.12	112	112	106	107	123	131	106	119	116	119	125	116	53.1	46.6	61.2	43.1	57.4	66.2	68.2	51.2	51.2	63.2	45.1	57	63.2	62.8	52.4	62.8	51.6	61.2	42	49.3
Lhcr4	TISO_07308	53.9	53.1	56.2	54.3	59.3	68.6	57	83.6	66.2	70.9	71.2	66.6	63.2	0	51.2	58.3533	0	0	52	49.7	0	51.2	0	50.4	0	0	0	18.4818	53.9	63.2	51.6	52.8	58.2	45.1	43.1	64.7	55.5	53.5	72.4	60.5	50.4	57.4	55.1	52	65.5	58.5	52	57.8
Lhcf1	TISO_07452	0	0	50.8	40	45.8	43.5	0	49.7	39.7	56.2	41.6	44.7	42	0	0	30.2667	52	52	48.5	0	50.4	50.1	42	0	0	44.3	46.2	35.0455	57.4	54.3	60.5	67	87.4	126	121	64.7	105	75.9	64.7	103	105	101	97.8	82	108	105	113	109
Lhcf2	TISO_07587	0	0	41.6	0	0	45.1	0	52.8	0	42.4	56.6	45.4	46.2	0	0	22.0067	63.9	63.9	0	0	51.6	41.2	47.8	47.8	50.4	47.8	41.2	41.4182	43.5	69.7	59.7	74.3	72	110	97.8	71.6	74.7	60.8	61.6	101	100	101	85.9	79.3	95.9	87.4	79	94.7
Lhcf3	TISO_08095	0	0	49.3	0	41.6	0	0	51.6	47.4	0	52.8	0	0	0	0	16.18	45.8	47.4	43.1	0	49.3	48.5	45.4	0	45.1	40.4	49.7	37.7	50.8	53.1	60.8	65.5	82.8	121	118	68.6	82.8	64.7	60.8	100	89.4	101	76.6	80.5	102	102	100	113
Lhcf4	TISO_08517	0	0	0	48.9	0	0	0	57	0	0	51.6	51.6	0	0	0	13.94	60.1	63.2	48.5	0	48.5	0	0	0	44.7	0	48.1	28.4636	192	209	189	88.2	52.4	62.4	56.2	161	50.1	45.8	104	65.9	59.7	55.8	52	62	68.6	60.8	50.8	54.3
Lhcr5	TISO_09963	118	77.8	126	55.8	63.9	0	141	52.4	122	48.1	43.5	47	47.8	105	111	77.2867	45.4	45.4	42.4	58.2	48.5	0	50.8	51.2	40	52.8	52	44.2455	41.2	0	44.7	43.5	0	0	0	42	0	0	0	0	0	0	0	0	0	0	0	0
Lhcx4	TISO_11242	76.3	72.4	86.3	48.1	51.6	49.7	85.1	81.6	75.1	50.1	85.1	0	58.5	59.3	65.5	62.98	134	132	125	111	126	127	108	123	126	127	120	123.545	47.8	52.8	62.8	46.6	70.1	65.5	58.9	55.8	60.1	70.1	54.7	57.8	60.5	63.9	51.2	66.6	54.3	57.4	42	46.6
Lhcf5	TISO_11770	48.5	45.4	53.9	39.7	40.4	59.3	58.2	59.3	48.9	52	70.1	50.8	45.1	0	45.8	47.8267	59.7	57.4	52.8	47	57.4	42.4	56.6	52.4	48.9	53.5	48.5	52.4182	103	97.8	108	137	62	69.3	63.5	93.2	54.3	71.2	147	73.9	65.9	79.3	54.3	52	75.9	85.5	74.7	70.5
Lhcf6	TISO_12017	0	45.1	50.1	46.6	0	49.7	45.4	47.4	49.3	40.8	61.2	57	40	0	0	35.5067	62.4	59.7	58.2	47.4	50.4	0	58.9	51.2	44.7	47.8	50.4	48.2818	105	106	101	132	66.2	75.1	68.9	89.7	60.5	70.1	146	77.4	60.8	61.6	45.1	58.5	76.3	69.7	67.4	63.5
Lhcf7	TISO_12558	0	0	0	0	0	0	0	0	0	0	0	0	0	0	0	0	0	0	0	0	0	0	0	0	0	0	0	0	0	0	0	53.5	0	0	0	0	0	0	66.2	0	0	0	0	0	0	0	0	0
Lhcf8	TISO_14333	0	41.6	46.2	40.8	0	44.7	49.3	53.9	42.7	51.6	74.7	53.9	43.5	0	45.4	39.22	66.2	67.4	49.7	54.7	52	63.9	50.1	45.4	0	43.5	67.4	50.9364	55.1	43.9	65.1	69.3	76.3	138	138	78.6	97.4	80.9	79	105	114	115	89.7	86.3	107	109	120	105
Lhcf9	TISO_14677	0	0	43.9	0	0	0	0	48.5	0	0	0	50.4	0	0	0	9.52	53.9	55.1	42.7	47	53.1	42	41.2	0	44.7	0	48.1	38.8909	49.3	68.2	58.5	81.6	90.5	121	123	55.8	88.2	75.1	51.2	100	89.4	98.2	81.3	89	102	89	94.7	100
Lhcf10	TISO_16944	0	0	43.9	0	0	0	0	48.5	0	0	0	49.3	0	0	0	9.44667	53.1	55.5	42	47	52.4	41.6	42	0	46.2	51.6	48.5	43.6273	47.4	48.9	53.1	84	90.1	119	120	50.8	88.6	74.3	51.6	98.2	87	98.2	78.2	86.3	102	88.6	94.7	100
Lhcf11	TISO_16947	0	0	0	0	0	0	0	0	0	0	0	0	0	0	0	0	0	0	0	0	0	0	0	0	0	0	0	0	0	0	0	0	44.3	41.2	43.5	0	0	0	0	47.4	0	52.8	0	37.7	50.4	48.5	43.5	55.5
Lhcf12	TISO_17799	40.8	0	41.2	46.6	0	49.7	41.6	53.9	40	0	66.2	39.7	0	0	47.4	31.14	72.8	73.9	55.5	53.9	55.8	63.9	52	44.7	40.4	49.3	52.8	55.9091	50.4	47.8	55.1	85.5	62.4	69.3	79.3	39.7	74.7	181	68.2	92.8	86.3	90.1	51.6	58.9	87.4	78.2	91.7	91.3
Lhcf13	TISO_18058	0	0	0	0	0	0	0	0	0	0	0	0	0	0	0	0	0	0	0	0	0	0	0	37.4	0	0	0	3.4	0	0	0	0	47	44.7	48.5	0	43.5	0	0	42.4	37.4	42	45.8	44.3	47.4	45.8	44.7	42
Lhcf14	TISO_18150	0	0	0	0	0	0	0	45.8	41.2	0	0	57.4	0	0	0	9.62667	58.9	57.8	44.7	0	51.2	44.7	0	47	0	0	0	27.6636	49.3	55.8	53.9	77	93.2	115	121	60.8	98.6	79.7	57.8	100	90.9	97.8	79.3	87.4	102	95.5	94	100
Lhcf15	TISO_18151	0	0	0	0	0	0	0	45.8	41.2	0	0	56.6	0	0	0	9.57333	58.5	58.2	44.3	0	51.2	0	0	47	0	0	0	23.5636	49.7	48.1	54.3	77	93.2	115	121	60.8	98.6	79.3	58.2	100	91.3	97.8	79.3	87.4	102	95.5	94	100
Lhcf16	TISO_19125	0	40.8	0	44.7	43.1	0	0	48.5	0	0	49.7	0	0	0	0	15.12	52	52.4	54.3	46.2	44.3	0	0	0	0	0	0	22.6545	196	211	204	112	55.1	55.8	55.8	189	54.3	0	106	73.6	54.3	71.6	64.7	64.7	83.2	65.1	57.8	75.9
Lhcf17	TISO_19286	47.4	46.6	48.1	59.3	44.3	0	0	59.7	52.4	0	48.9	53.1	0	0	0	30.6533	65.9	61.2	58.9	52	0	41.2	0	43.9	48.1	49.7	0	38.2636	228	249	211	130	57.8	70.9	68.9	178	54.3	40	122	92	63.2	97.4	58.9	56.2	84	83.6	66.6	96.7
Lhcf18	TISO_20897	0	0	0	0	0	0	0	48.5	0	0	38.9	50.8	0	0	0	9.21333	63.9	63.2	44.7	47.4	57.4	43.9	54.7	0	56.6	0	40.8	42.9636	54.7	53.9	58.5	62.8	84.7	110	112	62.8	94.7	73.9	54.7	99.4	92.4	98.6	81.3	85.5	102	88.6	91.7	102
Lhcx5	TISO_22079	57.8	66.2	59.3	54.3	40.8	64.3	68.6	69.7	49.7	59.3	70.9	50.8	55.8	0	0	51.1667	97.8	97.4	77	77.4	78.6	75.5	70.5	68.6	68.6	67	91.3	79.0636	48.5	62.4	72.4	57	66.6	67.8	79.7	51.6	55.1	77.8	72.8	71.2	80.9	83.6	67.4	73.6	76.6	66.6	75.5	70.9
Lhcf19	TISO_22153	0	42	44.3	40.8	0	48.9	0	43.1	45.1	42.7	43.1	40.8	0	0	0	26.0533	46.2	48.5	47	46.6	47	40.8	0	51.2	0	48.1	50.1	38.6818	0	50.8	43.9	70.1	75.9	115	124	60.5	92.8	60.1	58.9	91.7	89	101	92.8	77.4	90.9	87	89	90.9
Lhcf20	TISO_22154	0	45.1	54.7	42.4	0	42	41.2	47.8	50.1	47.4	53.5	39.7	0	0	41.6	33.7	57.8	55.1	52	43.9	57	45.1	50.1	54.3	47.4	51.6	59.7	52.1818	0	53.5	45.1	49.3	73.2	112	112	60.1	77.8	61.2	65.5	90.5	95.9	92	90.1	78.2	93.6	91.3	87.8	89.7
Lhcf21	TISO_22383	0	0	0	47	0	0	0	55.5	0	0	52.8	48.5	0	0	0	13.5867	56.6	56.6	52.4	0	0	0	0	44.3	49.7	47	0	27.8727	239	247	229	110	48.5	64.3	56.2	200	48.5	50.1	120	81.6	71.2	85.1	59.3	52.4	69.7	68.6	60.5	74.3
Lhcr6	TISO_23096	114	60.8	141	0	54.3	47.8	149	74.7	142	48.1	45.4	54.7	54.3	90.5	156	82.1733	63.2	62.4	0	44.7	44.7	50.1	53.5	50.4	51.2	45.1	56.6	47.4455	47	0	0	47.8	42.4	0	0	0	0	42.4	54.3	40.4	0	39.3	0	45.1	0	0	42.4	0
Lhcx6	TISO_23378	48.5	58.9	63.9	52.8	41.6	0	72	57	57.4	0	60.1	50.4	42	0	62.8	44.4933	136	133	134	127	116	141	112	133	136	137	152	132.455	0	0	0	0	55.1	43.1	38.9	0	44.3	40.4	45.4	45.8	41.2	51.2	40	51.6	48.1	43.9	48.5	0
Lhcx7	TISO_23447	45.1	65.5	66.2	51.2	46.6	0	77.4	60.5	64.3	42.4	56.2	50.8	39.3	43.5	67.8	51.7867	137	137	140	135	124	133	110	130	137	133	143	132.636	46.2	47.4	44.7	47	50.1	42	47.4	45.1	41.6	52.4	43.9	52.4	54.7	53.1	51.2	52.4	0	45.8	59.3	53.1
Lhcx8	TISO_23500	54.7	56.6	58.5	58.2	0	50.1	60.5	63.2	53.5	41.6	62.4	46.6	0	0	44.3	43.3467	116	119	126	115	106	126	100	105	99.4	106	125	113.036	43.1	45.8	52.8	0	52.4	45.4	49.3	52	47	52	51.6	39.7	43.9	46.6	39.7	49.7	40.8	43.5	52	0
Lhcx9	TISO_23568	61.6	74.7	70.1	54.7	48.9	51.2	75.1	60.5	69.7	48.5	70.9	61.6	41.6	57	69.3	61.0267	153	152	147	149	149	160	124	150	145	147	166	149.273	45.8	55.1	47	38.9	55.8	48.1	56.6	53.5	47.8	73.2	60.8	47	52	49.3	52.8	53.5	50.8	44.3	54.3	50.4
Lhcx10	TISO_23574	61.6	74.7	69.7	54.7	48.9	51.2	74.7	60.5	69.7	48.5	70.5	62	41.6	57	68.9	60.9467	152	152	147	149	149	160	124	150	145	147	166	149.182	45.8	55.1	47	38.9	55.8	47.8	56.6	53.5	47.8	72.8	60.8	46.6	52	49.3	52.4	53.5	50.8	44.3	54.7	50.4
Lhcr7	TISO_23827	72.8	95.1	76.3	79	76.3	65.9	77.4	153	75.5	92	80.9	89	83.2	73.2	67.8	83.8267	60.1	60.1	64.7	68.6	73.9	70.5	70.9	72.8	61.2	63.9	64.3	66.4545	0	60.5	52.4	62	52	44.7	41.2	57.4	47.8	62.8	48.1	55.8	48.9	58.5	40.8	0	52.8	48.1	59.7	49.7
Lhcx11	TISO_24321	66.6	63.5	68.9	55.1	0	45.4	75.1	72	65.9	54.3	73.2	55.1	39.7	52	65.1	56.7933	147	147	135	133	137	147	119	141	140	140	159	140.455	0	45.4	0	0	53.1	45.8	55.8	53.5	43.1	62.4	52	41.2	44.7	48.9	42	52.4	46.6	0	47.8	0
Lhcf22	TISO_24608	45.4	52.8	50.4	72.4	52.4	55.5	49.3	64.3	48.5	50.8	66.6	51.2	56.2	0	62.4	51.88	72	71.6	58.2	59.3	64.7	70.9	53.9	60.5	48.5	66.2	65.9	62.8818	46.6	54.3	50.8	71.2	72.4	80.1	84.7	42	75.9	194	73.9	100	96.3	91.7	58.9	62.4	85.1	78.6	99.4	92.4
Lhcr8	TISO_24841	87.8	91.7	95.1	80.1	130	84.3	76.6	105	87	149	88.6	93.6	147	79.3	70.5	97.7067	62.8	62.8	62	67.8	55.1	53.1	58.9	57.8	56.6	65.1	62.4	60.4	51.6	58.9	58.5	45.8	51.2	45.1	42	51.6	41.2	51.2	55.5	50.1	46.6	50.1	0	38.9	48.5	53.9	55.1	44.3
Lhcf23	TISO_25321	0	0	41.2	0	0	0	0	0	0	0	0	0	0	0	0	2.74667	0	0	0	0	0	0	0	0	0	0	0	0	0	0	0	0	0	0	0	0	0	0	0	0	0	0	0	0	0	0	0	0
Lhcx12	TISO_26583	55.5	70.9	60.1	55.8	0	50.1	65.1	68.2	63.2	50.1	65.5	55.1	49.7	59.3	57.8	55.0933	157	157	141	144	136	147	118	146	140	146	176	146.182	42	51.2	54.3	0	55.8	0	44.7	57.4	49.3	60.1	46.6	45.8	0	55.5	50.4	60.1	42.7	43.1	55.5	42.7
Lhcf24	TISO_26704	55.1	41.2	57.4	47.4	48.1	51.2	52.4	46.6	57	42	68.9	55.5	43.5	0	41.2	47.1667	64.7	66.6	47	40	45.8	45.4	47	47.4	41.6	48.9	44.7	49.0091	121	122	118	143	58.2	55.1	55.1	106	70.1	65.5	150	63.9	72	68.9	57.4	59.7	79.7	73.6	69.3	77
Lhcr9	TISO_28748	85.9	111	89.4	69.7	105	104	88.2	139	89.7	141	111	67.8	160	65.1	61.6	99.2267	71.2	70.9	73.9	73.9	70.5	64.7	65.1	63.5	60.8	65.5	68.2	68.0182	0	52.4	53.1	53.1	49.7	44.7	46.6	50.8	0	58.9	55.8	52	49.3	58.2	0	0	42.7	47.4	47	0
Lhcf25	TISO_28817	51.6	43.9	55.5	47	0	51.6	51.6	54.7	48.5	50.4	72.8	59.7	0	0	50.1	42.4933	81.3	81.3	56.6	59.7	60.5	65.9	63.9	61.2	62.4	59.3	67.4	65.4091	51.6	61.2	67	62.8	0	103	104	68.9	65.5	75.1	70.5	90.1	68.6	91.3	51.6	48.1	91.3	84.3	70.9	87
Lhcr10	TISO_29671	106	73.9	120	48.5	66.6	41.6	130	56.2	123	48.5	65.9	47.4	43.5	87.8	108	77.7933	64.3	64.3	66.6	76.3	52.8	60.5	55.1	64.3	61.2	59.7	55.5	61.8727	0	50.4	0	0	39.3	0	0	45.4	0	0	0	40.8	40.4	0	0	42.4	44.3	43.5	0	0
Lhcr11	TISO_32585	57	69.7	56.2	53.5	80.1	77.8	0	65.1	56.6	94.4	73.2	52.8	78.6	0	0	54.3333	62	61.6	49.3	49.3	0	0	0	51.2	0	53.9	0	29.7545	45.8	48.5	42.4	54.7	67.8	46.6	47.4	41.6	46.2	50.4	50.8	62.4	52.8	60.1	43.5	53.9	59.7	68.9	67	61.2
Lhcr12	TISO_33089	102	100	106	64.3	114	85.5	84	100	107	140	78.2	95.9	145	77.8	66.2	97.7267	63.2	63.2	60.8	62.4	47.8	59.3	46.6	52.4	49.3	52	61.6	56.2364	0	43.9	53.9	46.6	48.9	0	0	42	0	48.5	50.4	0	38.5	45.4	0	45.1	0	43.1	43.1	0
Lhcf26	TISO_36599	0	0	43.5	0	0	0	0	50.4	0	0	0	51.2	0	0	0	9.67333	54.7	56.2	43.5	45.4	54.3	43.9	42.4	0	45.8	50.4	49.3	44.1727	49.7	48.9	56.2	81.3	88.6	121	121	51.6	90.1	76.3	55.1	98.2	88.6	95.9	75.9	88.2	100	87	93.6	99.4
Lhcf27	TISO_36600	0	0	0	0	0	0	0	0	0	0	0	42.7	0	0	0	2.84667	0	0	0	0	0	0	0	0	0	0	0	0	42	0	50.1	63.9	69.3	103	102	42.4	73.6	59.7	43.9	76.6	76.6	76.6	65.1	73.2	82.8	68.6	75.1	79.7
Lhcf28	TISO_36835	55.5	39.3	61.2	44.3	0	45.1	50.8	55.8	58.9	53.5	57	57.8	0	47	48.5	44.98	67.8	66.2	0	45.4	52.8	48.5	59.7	47.4	49.3	45.8	0	43.9	65.1	68.2	57.8	76.3	52	74.3	75.5	72.8	48.9	62.4	103	67.8	74.7	74.3	58.5	59.7	73.9	73.6	66.6	71.6
[truncated: 4 more columns]

## Sheet: Table S5
		T. lutea VS T. pseudonana (bitscore)
	Name prot. T. lutea	Lhcr1	Lhcr3	Lhcr4	Lhcr5	Lhcr7	Lhcr8	Lhcr9	Lhcr10	Lhcr11	Lhcr12	Lhcr14	AVG	Lhcx1	Lhcx2	Lhcx4	Lhcx5	Lhcx6	Lhcx6_1	AVG	Lhcf1	Lhcf2	Lhcf4	Lhcf5	Lhcf6	Lhcf7	Lhcf8	Lhcf9	Lhcf10	Lhcf11	AVG
Lhcx1	TISO_00499	67.8	51.6	57	62.4	55.5	85.5	82.8	46.6	67	54.7	45.8	61.5182	152	152	138	139	137	79.7	132.95	47.4	47.4	41.2	42.4	47.4	64.3	42.4	42	57	50.8	48.23
Lhcr1	TISO_02238	93.6	93.6	93.6	87.8	113	77.4	73.6	49.7	84.3	98.6	77.8	85.7273	62.8	62.4	75.5	64.3	70.9	52	64.65	0	0	0	0	0	57.4	0	39.3	53.5	0	15.02
Lhcr2	TISO_02239	75.9	57	99.4	40	44.7	48.5	58.2	44.7	88.2	94.7	103	68.5727	0	0	0	0	0	0	0	0	0	0	0	0	0	0	0	0	0	0
Lhcx2	TISO_06854	75.1	45.8	53.5	58.9	60.8	94.4	77	40.4	57	52	50.1	60.4545	150	150	125	132	135	86.7	129.783	40.8	41.6	48.5	0	39.3	58.2	44.7	44.3	50.8	54.3	42.25
Lhcr3	TISO_07183	97.4	105	182	87.8	100	96.3	82.4	63.5	140	119	168	112.855	49.7	50.1	0	55.1	51.2	42.7	41.4667	52.8	52.8	52.4	53.1	47.4	49.3	47	47	59.3	49.3	51.04
Lhcx3	TISO_07276	89	42.4	61.6	81.3	50.8	88.6	78.2	47.4	57	55.1	50.1	63.7727	120	120	108	110	124	81.6	110.6	54.3	54.3	62	55.1	63.9	68.6	57.4	57	61.2	65.9	59.97
Lhcr4	TISO_07308	91.7	67.4	63.9	47.8	69.7	55.8	50.1	82.8	65.1	57	70.1	65.5818	58.5	58.2	57.8	0	45.1	38.5	43.0167	59.7	59.7	64.7	54.3	64.7	52.8	56.2	55.8	45.8	43.9	55.76
Lhcf1	TISO_07452	50.1	41.6	0	43.1	38.9	40.4	0	53.1	53.9	46.6	51.2	38.0818	68.2	68.2	46.2	45.4	49.3	50.1	54.5667	114	115	107	117	107	79.3	122	121	74.7	70.5	102.75
Lhcf2	TISO_07587	0	0	40.4	0	0	0	0	47	48.1	0	45.1	16.4182	62.4	62.8	43.1	0	0	47.4	35.95	99.4	99.8	94.4	109	94	55.5	91.3	91.3	65.5	62	86.22
Lhcf3	TISO_08095	51.6	0	0	0	0	45.1	0	49.7	57	50.1	43.1	26.9636	62	62.4	45.4	42	45.8	51.6	51.5333	102	102	99	105	91.7	52	106	106	69.7	64.7	89.81
Lhcf4	TISO_08517	0	0	42.4	0	0	41.2	0	52.8	52	50.8	0	21.7455	61.6	62	0	0	0	0	20.6	69.3	68.9	67.8	57	62	46.2	53.1	52.8	0	0	47.71
Lhcr5	TISO_09963	60.5	57.8	44.7	119	62.4	129	145	0	63.9	68.6	41.2	72.0091	45.1	45.1	0	39.3	46.2	0	29.2833	0	0	0	0	0	0	0	0	0	0	0
Lhcx4	TISO_11242	88.6	50.8	68.2	75.9	55.5	82.8	72	48.5	61.2	62	51.2	65.1545	129	128	117	121	122	87.4	117.4	52.8	52.8	60.5	50.8	56.6	77	52.8	52.4	53.9	62.8	57.24
Lhcf5	TISO_11770	55.8	67	45.4	47	53.9	50.8	44.7	79.7	65.1	50.8	48.5	55.3364	63.9	63.5	41.2	57.8	0	55.8	47.0333	81.6	81.3	70.1	78.6	55.1	57.8	63.9	63.9	49.7	68.6	67.06
Lhcf6	TISO_12017	43.9	65.5	0	40.4	46.6	0	42.4	76.3	51.6	0	40	36.9727	58.9	58.5	0	53.1	40.4	44.7	42.6	72.8	73.2	62	71.6	58.5	59.3	61.2	62	45.4	53.5	61.95
Lhcf7	TISO_12558	0	0	0	0	0	0	0	0	0	0	0	0	0	0	0	0	0	0	0	0	0	0	0	0	0	0	0	0	0	0
Lhcf8	TISO_14333	55.1	42.7	52.4	41.6	39.3	43.1	0	0	41.2	43.5	52	37.3545	76.6	76.6	70.1	45.4	61.6	55.1	64.2333	114	114	110	115	108	98.2	107	106	77.8	89.7	103.97
Lhcf9	TISO_14677	46.6	0	0	0	0	0	0	48.9	47.8	0	43.9	17.0182	71.2	71.2	0	46.2	44.7	44.3	46.2667	105	107	93.6	106	86.3	65.5	96.7	98.2	58.5	69.7	88.65
Lhcf10	TISO_16944	47.8	0	0	0	0	0	0	48.1	47	0	44.7	17.0545	71.2	71.6	0	45.1	46.2	44.7	46.4667	105	106	93.2	104	84.3	63.5	99	97.4	55.8	70.5	87.87
Lhcf11	TISO_16947	0	0	0	0	0	0	0	0	0	0	0	0	47	46.6	0	0	0	0	15.6	42	43.9	45.1	42.7	0	0	0	0	0	0	17.37
Lhcf12	TISO_17799	45.8	44.7	0	42.7	46.6	48.5	43.1	0	44.3	39.7	39.7	35.9182	72	72	48.1	47.4	53.5	66.6	59.9333	89	91.3	90.5	92	102	244	87.8	89.4	57	199	114.2
Lhcf13	TISO_18058	0	0	0	0	0	0	0	0	0	0	0	0	0	0	0	0	0	0	0	47.4	47.4	42.7	44.3	40	0	45.4	45.8	0	0	31.3
Lhcf14	TISO_18150	45.8	38.5	0	0	0	0	0	41.2	51.2	0	43.9	20.0545	73.2	73.2	0	0	0	49.3	32.6167	106	107	96.3	106	89.4	67.4	97.8	99.4	59.3	71.2	89.98
Lhcf15	TISO_18151	45.8	0	0	0	0	0	0	41.6	51.2	0	43.9	16.5909	73.2	73.2	0	0	39.3	49.3	39.1667	106	107	96.3	106	89.4	67	97.8	99.4	59.3	71.2	89.94
Lhcf16	TISO_19125	0	0	0	48.5	0	0	0	0	0	39.7	0	8.01818	57.4	56.6	45.4	0	0	0	26.5667	66.2	66.6	70.9	65.9	65.9	48.9	77	77.4	45.8	0	58.46
Lhcf17	TISO_19286	60.5	53.1	0	0	40	40	0	63.5	55.1	39.3	0	31.9545	75.9	75.5	51.6	0	0	0	33.8333	84	84.3	86.7	73.2	78.2	44.7	80.5	80.5	50.1	48.5	71.07
Lhcf18	TISO_20897	52	0	0	0	0	0	0	41.2	43.9	0	0	12.4636	74.7	74.3	0	0	43.5	46.2	39.7833	102	103	99	99.8	90.9	57.8	101	102	59.7	67	88.22
Lhcx5	TISO_22079	71.6	56.6	67.8	71.2	61.6	43.9	53.5	45.1	54.3	50.4	57.4	57.5818	91.7	91.3	82.4	70.9	70.9	79	81.0333	83.2	83.2	73.2	90.5	80.5	83.2	73.9	73.6	63.9	79.7	78.49
Lhcf19	TISO_22153	45.4	0	0	39.7	43.9	48.9	0	43.5	46.2	0	40	27.9636	54.7	55.1	57.4	0	45.4	45.4	43	91.3	91.3	89	91.7	80.5	62.8	99	98.2	69.3	51.2	82.43
Lhcf20	TISO_22154	0	0	41.6	0	0	44.3	0	42.4	52.8	47.4	45.1	24.8727	71.6	71.6	47.8	0	42.7	51.2	47.4833	95.1	95.9	92	92.8	79.3	56.2	100	95.9	83.6	55.8	84.66
Lhcf21	TISO_22383	52.4	42.7	0	0	0	0	0	56.2	55.5	47.8	39.7	26.7545	64.3	63.9	52.4	0	0	38.9	36.5833	76.3	76.3	78.2	89.4	92	0	68.6	68.6	55.5	38.9	64.38
Lhcr6	TISO_23096	55.8	48.1	53.1	158	55.1	147	141	0	53.1	48.1	50.1	73.5818	52.8	52.4	43.5	48.1	47.4	40	47.3667	0	0	0	0	0	45.1	0	0	0	0	4.51
Lhcx6	TISO_23378	56.2	45.1	0	63.5	0	65.1	84.3	0	0	41.2	0	32.3091	136	136	127	129	124	68.2	120.033	0	0	39.3	0	40.4	48.5	0	0	0	42	17.02
Lhcx7	TISO_23447	53.1	0	42.4	61.2	45.8	73.2	78.6	0	45.8	0	40.4	40.0455	145	145	127	121	124	77	123.167	44.3	44.3	53.1	0	0	43.9	52	51.6	0	44.7	33.39
Lhcx8	TISO_23500	69.3	0	45.4	55.1	45.4	59.7	57	0	42	0	43.5	37.9455	123	123	111	99.4	126	63.9	107.717	44.7	44.7	41.6	0	47	51.6	0	0	46.6	43.5	31.97
Lhcx9	TISO_23568	71.2	61.6	51.6	65.1	51.6	87.8	77.8	43.1	66.2	57.8	42.7	61.5	155	155	145	145	153	88.2	140.2	48.1	49.3	46.6	42.4	50.4	65.1	46.2	45.8	53.9	61.6	50.94
Lhcx10	TISO_23574	70.9	61.2	51.6	65.1	52	87.8	77.8	43.1	66.2	57.8	42.7	61.4727	155	155	145	145	153	88.2	140.2	48.1	48.9	46.2	42.4	50.4	65.1	46.2	45.4	53.9	61.6	50.82
Lhcr7	TISO_23827	123	105	91.7	73.6	75.5	74.7	65.9	48.1	79.7	72.8	89.7	81.7909	67.4	68.2	61.6	75.9	63.5	55.5	65.35	40.4	40.8	46.6	41.2	46.2	59.3	45.4	45.4	57.4	51.2	47.39
Lhcx11	TISO_24321	69.3	53.5	51.2	63.2	39.7	84.3	79.7	40.4	61.2	58.2	44.7	58.6727	146	146	140	135	145	78.6	131.767	40.8	40.8	43.9	40	45.1	64.3	40.8	40	50.1	52.8	45.86
Lhcf22	TISO_24608	52.8	53.1	42.7	46.6	48.5	53.1	47.8	0	48.1	44.7	44.7	43.8273	80.5	80.5	52.4	54.7	65.9	65.9	66.65	94.4	94.4	88.2	91.3	100	236	92	91.7	64.7	195	114.77
Lhcr8	TISO_24841	108	106	152	73.9	76.6	81.6	84	52	132	141	132	103.555	65.9	65.5	63.2	52.4	53.5	0	50.0833	46.2	46.2	38.9	50.1	44.7	40.4	0	0	50.4	39.7	35.66
Lhcf23	TISO_25321	0	0	0	0	0	0	0	0	0	0	0	0	0	0	0	0	0	0	0	0	0	0	0	0	0	0	0	0	0	0
Lhcx12	TISO_26583	73.9	60.8	62.4	62	54.7	84.3	66.2	43.9	55.8	50.4	50.4	60.4364	157	157	132	148	140	81.3	135.883	44.3	45.4	0	43.5	47.8	67	43.5	42.7	52	50.4	43.66
Lhcf24	TISO_26704	56.6	53.9	0	52.4	40.4	39.3	53.5	52.8	45.1	43.5	0	39.7727	56.6	56.6	40.4	0	43.9	0	32.9167	78.2	78.2	70.1	73.9	77.4	56.6	74.3	74.3	52	52.4	68.74
Lhcr9	TISO_28748	114	81.3	166	79.3	75.5	84	72.8	54.3	120	126	142	101.382	64.7	64.7	69.7	65.5	60.5	52.8	62.9833	45.1	45.4	52	0	48.1	45.8	0	0	59.3	43.9	33.96
Lhcf25	TISO_28817	50.4	59.3	42.4	60.1	53.5	63.5	49.3	0	51.2	43.1	45.4	47.1091	82	81.6	77	67.8	63.9	53.5	70.9667	84.3	84.3	82.8	78.2	80.1	70.1	71.2	71.6	55.8	72.8	75.12
Lhcr11	TISO_29671	63.5	48.5	42	118	51.6	136	136	39.7	77.4	77.4	0	71.8273	70.1	69.7	59.7	60.8	60.8	0	53.5167	0	0	0	0	0	40	0	0	0	0	4
Lhcr12	TISO_32585	67.4	53.1	87.8	42.7	63.5	0	0	47	95.9	90.9	87.4	57.7909	57.8	57.4	50.1	47.4	47	0	43.2833	62.4	62.4	58.5	60.5	47.8	0	50.8	50.4	46.6	0	43.94
Lhcr13	TISO_33089	79	92	150	62.8	77.8	89.4	71.6	45.8	122	119	117	93.3091	52.8	52.4	63.2	53.1	60.5	0	47	0	0	0	42	0	0	0	0	43.5	0	8.55
Lhcf26	TISO_36599	50.4	0	0	0	0	0	0	49.7	47	0	45.8	17.5364	72.4	72.4	0	47	46.2	46.6	47.4333	103	105	94.7	104	86.3	65.5	94.4	95.5	58.2	73.2	87.98
Lhcf27	TISO_36600	0	0	0	0	0	0	0	44.3	45.8	0	41.6	11.9727	0	0	0	0	0	0	0	92.4	92.8	82.8	90.9	72.4	51.2	79.7	79	46.2	57.4	74.48
Lhcf28	TISO_36835	45.4	59.3	0	63.5	47.4	54.3	0	49.3	43.5	41.2	0	36.7182	53.1	52.4	42.4	0	0	0	24.65	72	72	72.8	68.2	68.6	60.8	68.6	68.9	70.9	46.6	66.94
